# Supplementary material
Source: Springer Nature journal article supplement (https://www.springermedizin.de/resource/supplementary/13046_2010_430_MOESM1_ESM.pdf/9662178)

## 2-yr OS

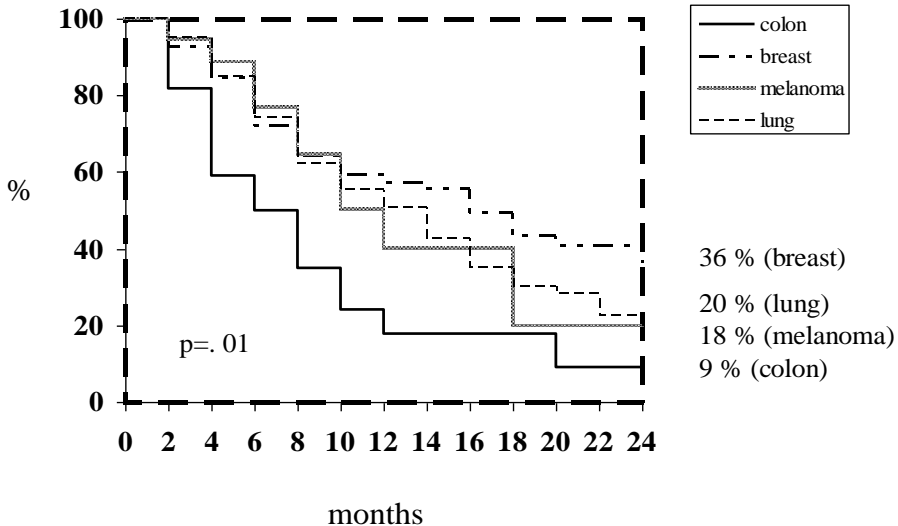

Supplement: MOESM1 [file 9662178]
